# Supplementary material for: Water Extract of Agastache rugosa Prevents Ovariectomy-Induced Bone Loss by Inhibiting Osteoclastogenesis
Source: PubMed Central journal article supplement (PMC7555585; doi:10.3390/foods9091181), 2020-08-26
Supplement: foods-09-01181-s001.pdf [file foods-09-01181-s001.pdf]

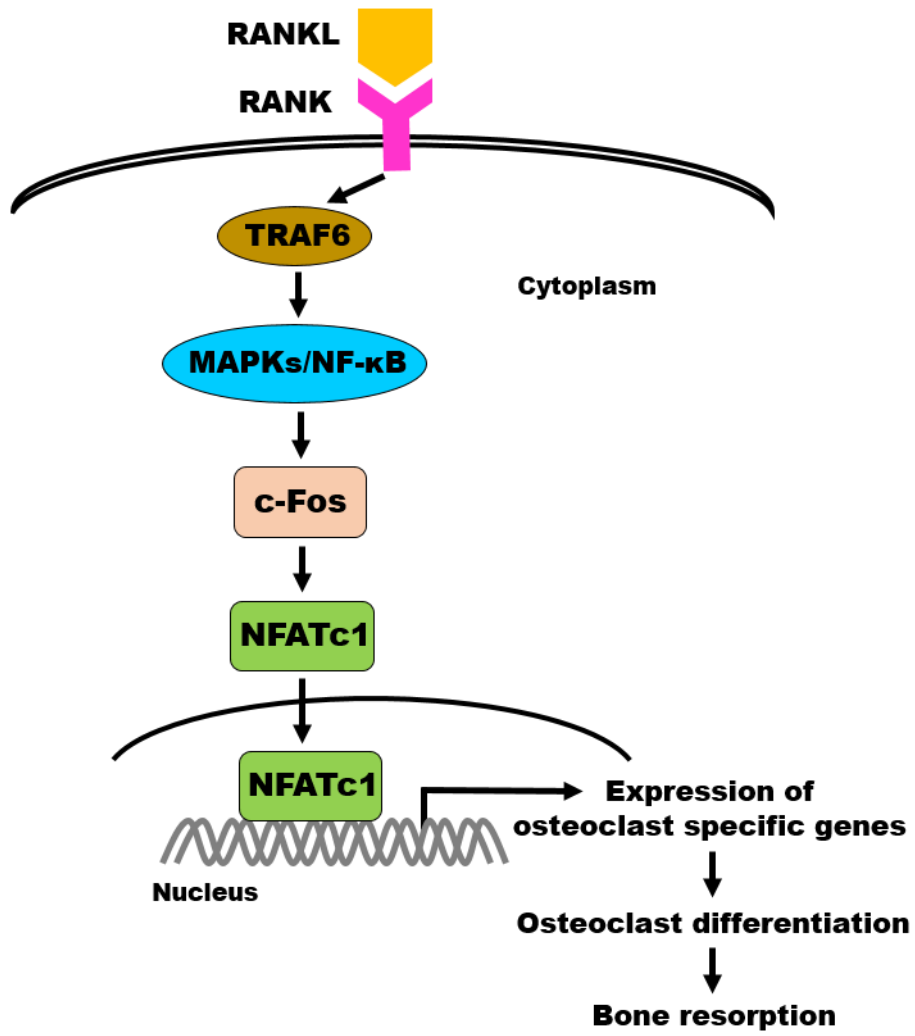

Figure 1. The RANK-RANKL signaling in osteoclastogenesis.
